# Supplementary material for: Improved linkage analysis of Quantitative Trait Loci using bulk segregants unveils a novel determinant of high ethanol tolerance in yeast
Source: PubMed Central journal article supplement (PMC4003806; doi:10.1186/1471-2164-15-207), 2014-03-19

High Noise level

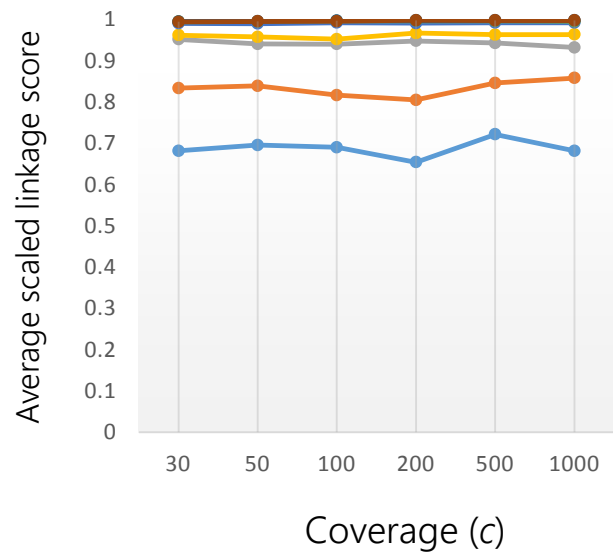

Low Noise level

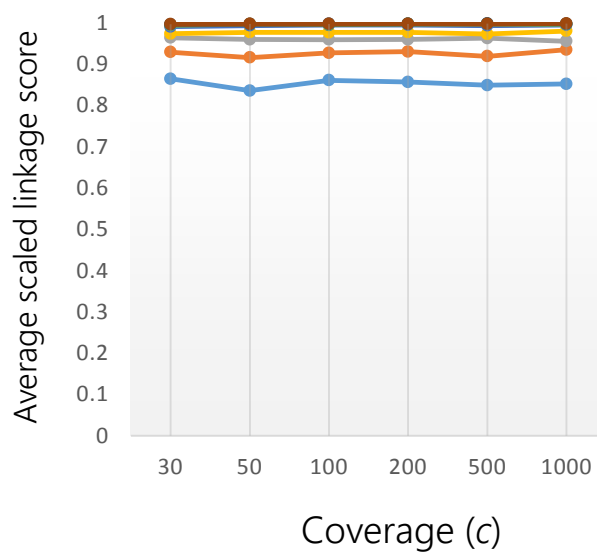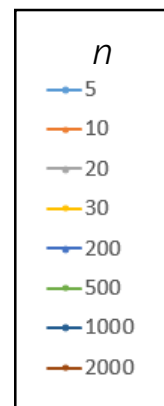

Supplement: 1471-2164-15-207-S1.pdf [file 1471-2164-15-207-S1.pdf]
