# Supplementary material for: Improved linkage analysis of Quantitative Trait Loci using bulk segregants unveils a novel determinant of high ethanol tolerance in yeast
Source: PubMed Central journal article supplement (PMC4003806; doi:10.1186/1471-2164-15-207), 2014-03-19

High noise level

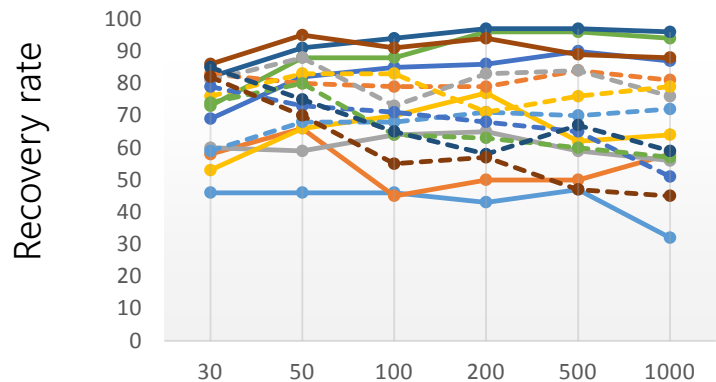

Low noise level

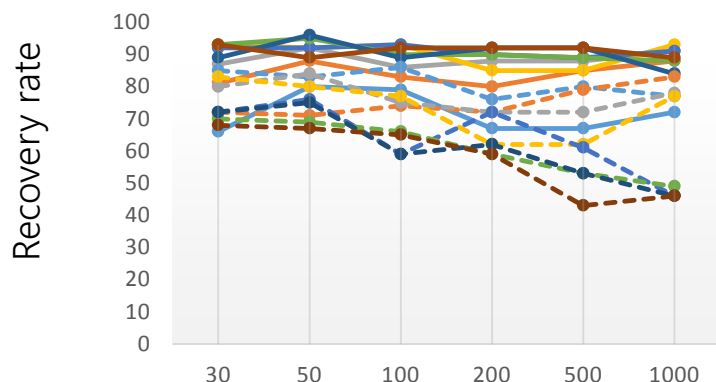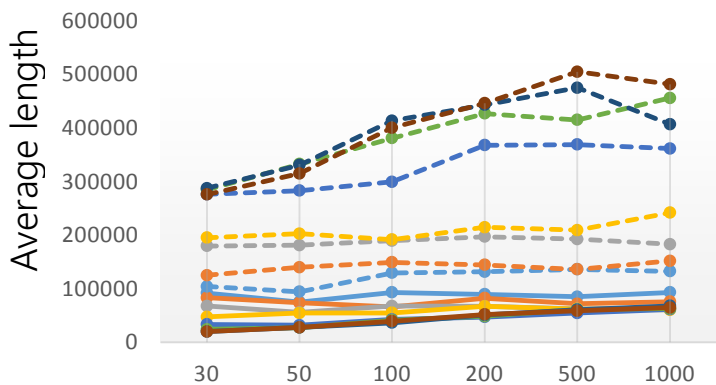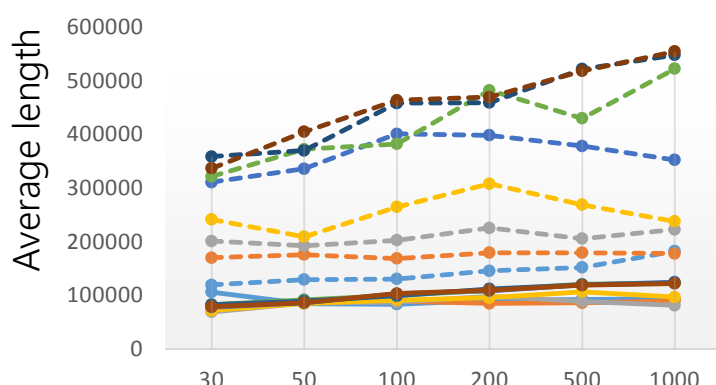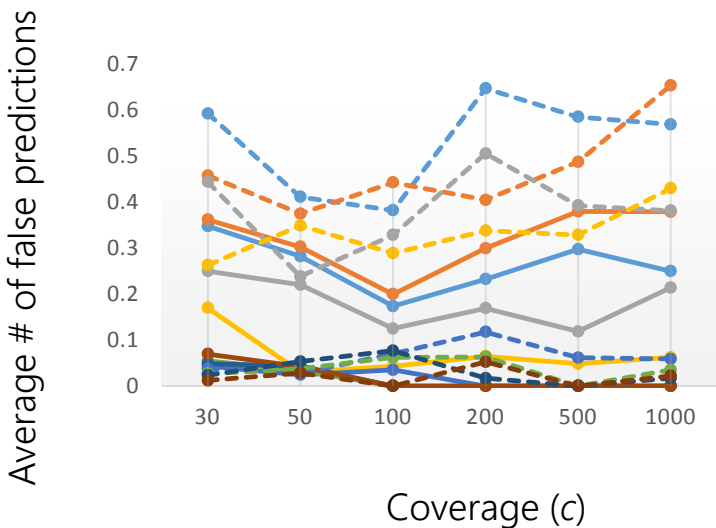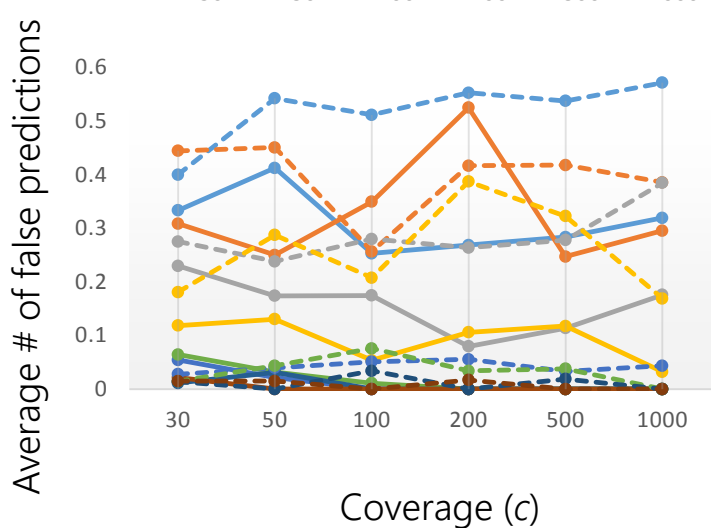Method -  $n$ 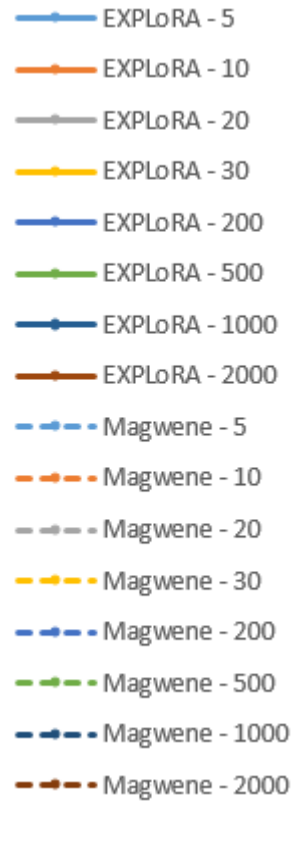

Supplement: 1471-2164-15-207-S2.pdf [file 1471-2164-15-207-S2.pdf]
